# Supplementary material for: Genetic variations in MAGE-A11 predict the risk and survival of renal cell cancer
Source: PubMed Central journal article supplement (PMC6775520; doi:10.7150/jca.32675), 2019-08-27
Supplement: jcav10p4860s1.pdf [file jcav10p4860s1.pdf]

Table S1. Demographic characteristic and clinical features among RCC case patients and control subjects in validation set.

| Characteristics                          | Number of cases (%) | Number of controls (%) |
|------------------------------------------|---------------------|------------------------|
| Overall                                  | 500                 | 470                    |
| Age (years) (mean $\pm$ SD)              | 56.53 $\pm$ 11.94   | 55.78 $\pm$ 11.83      |
| BMI (kg/m <sup>2</sup> ) (mean $\pm$ SD) | 24.09 $\pm$ 2.85    | 23.87 $\pm$ 3.31       |
| Gender                                   |                     |                        |
| Male                                     | 316 (63.2)          | 313 (66.6)             |
| Female                                   | 184 (36.8)          | 157 (33.4)             |
| Smoking status                           |                     |                        |
| Never                                    | 321 (64.2)          | 309 (65.7)             |
| Ever                                     | 179 (35.8)          | 161 (34.3)             |
| Drinking status                          |                     |                        |
| Never                                    | 369 (73.8)          | 344 (73.2)             |
| Ever                                     | 131 (26.2)          | 126 (26.8)             |
| Hypertension                             |                     |                        |
| No                                       | 302 (60.4)          | 347 (73.8)             |
| Yes                                      | 198 (39.6)          | 123 (26.2)             |
| Diabetes                                 |                     |                        |
| No                                       | 438 (87.6)          | 437 (93.0)             |
| Yes                                      | 62 (12.4)           | 33 (7.0)               |
| Family history of cancer                 |                     |                        |
| No                                       | 466 (93.2)          | 443 (94.3)             |
| Yes                                      | 34 (6.8)            | 27 (5.7)               |
| Clinical stage                           |                     |                        |
| I                                        | 324 (64.8)          |                        |
| II                                       | 100 (20.0)          |                        |
| III                                      | 32 (6.4)            |                        |
| IV                                       | 44 (8.8)            |                        |
| Tumor grade                              |                     |                        |
| I                                        | 106 (21.2)          |                        |
| II                                       | 259 (51.8)          |                        |
| III                                      | 107 (21.4)          |                        |
| IV                                       | 28 (5.6)            |                        |
| Histology                                |                     |                        |
| Clear cell                               | 420 (84.0)          |                        |
| Papillary                                | 22 (4.4)            |                        |
| Chromophobe                              | 26 (5.2)            |                        |
| Unclassified                             | 32 (6.4)            |                        |

Table S2. Stratification analyses between *MAGE-A1*rs6641352 polymorphism and risk factors in dominant model.

| Variables                | Cases <sup>a</sup> | Controls <sup>a</sup> | OR (95%CI) <sup>b</sup>   | P <sup>b</sup> |
|--------------------------|--------------------|-----------------------|---------------------------|----------------|
| Age                      |                    |                       |                           |                |
| ≤57                      | 308/190/30         | 366/165/29            | <b>1.338(1.038-1.725)</b> | <b>0.025</b>   |
| > 57                     | 288/167/27         | 269/154/22            | 1.302(0.977-1.735)        | 0.071          |
| BMI                      |                    |                       |                           |                |
| ≤24                      | 309/166/36         | 356/133/20            | <b>1.450(1.108-1.899)</b> | <b>0.007</b>   |
| >24                      | 287/191/21         | 269/154/22            | 1.180(0.903-1.542)        | 0.226          |
| Gender                   |                    |                       |                           |                |
| Male                     | 359/239/42         | 413/196/30            | <b>1.408(1.116-1.778)</b> | <b>0.004</b>   |
| Female                   | 237/118/15         | 212/91/12             | 1.169(0.846-1.617)        | 0.344          |
| Smoking status           |                    |                       |                           |                |
| Never                    | 395/213/30         | 424/184/31            | 1.205(0.954-1.521)        | 0.117          |
| Former                   | 88/56/10           | 41/19/3               | 1.654(0.863-3.170)        | 0.13           |
| Current                  | 113/88/17          | 160/84/8              | <b>1.672(1.137-2.457)</b> | <b>0.009</b>   |
| Drinking status          |                    |                       |                           |                |
| Never                    | 448/256/37         | 473/199/32            | <b>1.324(1.062-1.650)</b> | <b>0.013</b>   |
| Ever                     | 148/101/20         | 152/88/10             | 1.361(0.934-1.981)        | 0.108          |
| Hypertension             |                    |                       |                           |                |
| No                       | 372/211/37         | 454/223/31            | 1.156(0.921-1.451)        | 0.221          |
| Yes                      | 224/146/20         | 171/64/11             | <b>1.830(1.286-2.604)</b> | <b>0.001</b>   |
| Diabetes                 |                    |                       |                           |                |
| No                       | 525/306/48         | 591/267/38            | <b>1.325(1.087-1.615)</b> | <b>0.005</b>   |
| Yes                      | 71/51/9            | 34/20/4               | 1.196(0.609-2.351)        | 0.603          |
| Family history of cancer |                    |                       |                           |                |
| No                       | 551/340/53         | 587/260/39            | <b>1.395(1.147-1.696)</b> | <b>0.001</b>   |
| Yes                      | 45/17/4            | 38/27/3               | 0.627(0.284-1.382)        | 0.247          |

<sup>a</sup> Sample size of subjects with major homozygote/heterozygote/minor homozygote;

<sup>b</sup> Adjusted for age, sex, BMI, smoking status, drinking status, hypertension, diabetes and family history of cancer in logistic regression Dominant (TC/CC vs. TT) model; OR, odds ratio; CI, confidence interval.

Table S3. Stratification analyses between *MAGE-A11* rs6641352 polymorphism and clinicopathologic parameters of RCC in dominant model.

| Variables                       | Genotypes  |              | TC/CC vs. TT               |                |
|---------------------------------|------------|--------------|----------------------------|----------------|
|                                 | TT, N (%)  | TC/CC, N (%) | OR (95%CI) <sup>a</sup>    | P <sup>a</sup> |
| Controls (N=954)                | 625 (65.5) | 329 (34.5)   | 1.00 (reference)           |                |
| Cases (N=1010)                  | 596 (59.0) | 414 (41.0)   | <b>1.315(1.089-1.588)</b>  | <b>0.004</b>   |
| Clinical stage                  |            |              |                            |                |
| Localized (I/II)                | 506 (59.1) | 350 (40.9)   | <b>1.309 (1.075-1.594)</b> | <b>0.007</b>   |
| Advanced (III/IV)               | 90 (58.4)  | 64 (41.6)    | 1.409 (0.982-2.061)        | 0.062          |
| Tumor grade                     |            |              |                            |                |
| Well differentiated (I+II)      | 434 (59.0) | 301 (41.0)   | <b>1.314 (1.071-1.612)</b> | <b>0.009</b>   |
| Moderately differentiated (III) | 129 (61.1) | 82 (38.9)    | 1.219 (0.884-1.681)        | 0.227          |
| Poorly differentiated (IV)      | 33 (51.6)  | 31 (48.4)    | <b>1.921 (1.137-3.247)</b> | <b>0.015</b>   |
| Histology                       |            |              |                            |                |
| Clear cell                      | 500 (59.3) | 343 (40.7)   | <b>1.271 (1.043-1.549)</b> | <b>0.017</b>   |
| Others                          | 96 (57.5)  | 71 (42.5)    | <b>1.588 (1.103-2.200)</b> | <b>0.012</b>   |

<sup>a</sup> Adjusted for age, sex, BMI, smoking status, drinking status, hypertension, diabetes and family history of cancer in logistic regression Dominant (TC/CC vs. TT) model; OR, odds ratio; CI, confidence interval.

Table S4. Associations between the *MAGE-A11* rs6641352 genotype in dominant model and clinical features of RCC.

| Variables      | Genotypes  |              | TC/CC vs. TT            |                    |
|----------------|------------|--------------|-------------------------|--------------------|
|                | TT, N (%)  | TC/CC, N (%) | OR (95%CI) <sup>a</sup> | P <sup>a</sup>     |
| Clinical stage |            |              |                         | 0.981 <sup>b</sup> |
| I              | 387 (58.8) | 271 (41.2)   | 1.000 (reference)       |                    |
| II             | 119 (60.1) | 79 (39.9)    | 0.961 (0.677-1.364)     | 0.824              |
| III            | 42 (57.5)  | 31 (42.5)    | 0.968 (0.568-1.649)     | 0.904              |
| IV             | 48 (59.3)  | 33 (60.7)    | 0.819 (0.461-1.453)     | 0.495              |
| Tumor grade    |            |              |                         | 0.493 <sup>b</sup> |
| I              | 126 (57.0) | 95 (43.0)    | 1.000 (reference)       |                    |
| II             | 308 (59.9) | 206 (40.1)   | 0.873 (0.625-1.219)     | 0.425              |
| III            | 129 (61.1) | 82 (38.9)    | 0.861 (0.560-1.325)     | 0.497              |
| IV             | 33 (51.6)  | 31 (48.4)    | 1.332 (0.669-2.650)     | 0.414              |
| Histology      |            |              |                         | 0.385 <sup>b</sup> |
| Clear cell     | 500 (59.3) | 343 (40.7)   | 1.000 (reference)       |                    |
| Papillary      | 19 (52.8)  | 17 (47.2)    | 1.331 (0.672-2.638)     | 0.413              |
| Chromophobe    | 28 (50.9)  | 27 (49.1)    | 1.595 (0.906-2.806)     | 0.106              |
| Unclassified   | 49 (64.5)  | 27 (35.5)    | 0.816 (0.483-1.381)     | 0.449              |

<sup>a</sup> Adjusted for age, sex, BMI, smoking status, drinking status, hypertension, diabetes, family history of cancer, clinical stage, tumor grade and histology in logistic regression Dominant (TC/CC vs. TT) model;

<sup>b</sup> P for  $\chi^2$ -test of R-by-C table.

OR, odds ratio; CI, confidence interval.

Table S5. Stratification analyses between *MAGE-A11* rs6540341 polymorphism and risk factors in dominant model.

| Variables                | Cases <sup>a</sup> | Controls <sup>a</sup> | OR (95%CI) <sup>b</sup>    | P <sup>b</sup> |
|--------------------------|--------------------|-----------------------|----------------------------|----------------|
| Age                      |                    |                       |                            |                |
| ≤57                      | 287/191/50         | 352/178/30            | 1.405 (1.095-1.804)        | 0.008          |
| > 57                     | 274/168/40         | 234/137/23            | 1.159 (0.878-1.529)        | 0.297          |
| BMI                      |                    |                       |                            |                |
| ≤24                      | 290/177/44         | 313/168/28            | 1.246 (0.962-1.614)        | 0.096          |
| > 24                     | 271/182/46         | 273/147/25            | 1.376 (1.054-1.797)        | 0.019          |
| Gender                   |                    |                       |                            |                |
| Male                     | 358/228/55         | 382/216/41            | 1.207 (0.959-1.519)        | 0.108          |
| Female                   | 204/131/35         | 204/99/12             | <b>1.483 (1.083-2.029)</b> | <b>0.014</b>   |
| Smoking status           |                    |                       |                            |                |
| Never                    | 356/219/63         | 394/211/34            | <b>1.266 (1.010-1.587)</b> | <b>0.041</b>   |
| Former                   | 96/42/17           | 40/17/6               | 1.107 (0.586-2.093)        | 0.754          |
| Current                  | 110/98/10          | 152/87/13             | <b>1.516 (1.036-2.218)</b> | <b>0.032</b>   |
| Drinking status          |                    |                       |                            |                |
| Never                    | 410/263/68         | 432/234/38            | <b>1.280 (1.034-1.585)</b> | <b>0.024</b>   |
| Ever                     | 151/96/22          | 154/81/15             | 1.315 (0.903-1.914)        | 0.153          |
| Hypertension             |                    |                       |                            |                |
| No                       | 344/221/55         | 438/230/40            | <b>1.319 (1.055-1.649)</b> | <b>0.015</b>   |
| Yes                      | 217/138/35         | 148/85/13             | 1.265 (0.906-1.767)        | 0.168          |
| Diabetes                 |                    |                       |                            |                |
| No                       | 491/313/75         | 548/298/50            | <b>1.255 (1.035-1.522)</b> | <b>0.021</b>   |
| Yes                      | 70/46/15           | 38/17/3               | <b>2.065 (1.034-4.125)</b> | <b>0.04</b>    |
| Family history of cancer |                    |                       |                            |                |
| No                       | 523/337/84         | 546/293/47            | <b>1.323 (1.093-1.602)</b> | <b>0.004</b>   |
| Yes                      | 39/22/6            | 40/22/6               | 0.928 (0.425-2.206)        | 0.851          |

<sup>a</sup>Sample size of subjects with major homozygote/heterozygote/minor homozygote;

<sup>b</sup>Adjusted for age, sex, BMI, smoking status, drinking status, hypertension, diabetes and family history of cancer in logistic regression Dominant (TC/CC vs. TT) model; OR, odds ratio; CI, confidence interval.

Table S6. Stratification analyses between *MAGE-A11* rs6540341 polymorphism and clinicopathologic parameters of RCC in dominant model.

| Variables                       | Genotypes  |            | CT/TT vs. CC               |                  |
|---------------------------------|------------|------------|----------------------------|------------------|
|                                 | CC,N(%)    | TC/TT,N(%) | OR(95%CI) <sup>a</sup>     | P <sup>a</sup>   |
| Controls (N=954)                | 586 (61.4) | 368 (38.6) | 1.000 (reference)          |                  |
| Cases (N=1010)                  | 561 (55.5) | 449 (44.5) | 1.301 (1.081-1.564)        | 0.005            |
| Clinical stage                  |            |            |                            |                  |
| Localized (I/II)                | 473 (55.3) | 383 (44.7) | <b>1.322 (1.090-1.603)</b> | <b>0.005</b>     |
| Advanced (III/IV)               | 88 (57.1)  | 66 (42.9)  | 1.226 (0.860-1.748)        | 0.260            |
| Tumor grade                     |            |            |                            |                  |
| Well differentiated (I+II)      | 390 (53.1) | 345 (46.9) | <b>1.430 (1.171-1.747)</b> | <b>&lt;0.001</b> |
| Moderately differentiated (III) | 130 (61.6) | 81 (38.4)  | 1.054 (0.768-1.448)        | 0.743            |
| Poorly differentiated (IV)      | 41 (64.1)  | 23 (35.9)  | 0.902 (0.528-1.541)        | 0.705            |
| Histology                       |            |            |                            |                  |
| Clear cell                      | 467 (55.4) | 376 (44.6) | <b>1.299 (1.070-1.576)</b> | <b>0.008</b>     |
| Others                          | 94 (56.3)  | 73 (43.7)  | 1.307 (0.930-1.836)        | 0.123            |

<sup>a</sup> Adjusted for age, sex, BMI, smoking status, drinking status, hypertension, diabetes and family history of cancer in logistic regression Dominant (TC/CC vs. TT) model; OR, odds ratio; CI, confidence interval.

Table S7. Associations between the *MAGE-A11* rs6540341 genotype in dominant model and clinical features of RCC.

| Variables      | Genotypes  |            | CT/TT vs. CC           |                    |
|----------------|------------|------------|------------------------|--------------------|
|                | CC,N(%)    | TC/TT,N(%) | OR(95%CI) <sup>a</sup> | P <sup>a</sup>     |
| Clinical stage |            |            |                        | 0.941 <sup>b</sup> |
| I              | 366 (55.6) | 292 (44.4) | 1.000 (reference)      |                    |
| II             | 107 (54.0) | 91 (46.0)  | 1.192 (0.844-1.684)    | 0.318              |
| III            | 41 (56.2)  | 32 (43.8)  | 1.256 (0.740-2.129)    | 0.398              |
| IV             | 47 (58.0)  | 34 (42.0)  | 1.243 (0.708-2.184)    | 0.449              |
| Tumor grade    |            |            |                        | 0.070 <sup>b</sup> |
| I              | 120 (54.3) | 101 (45.7) | 1.000 (reference)      |                    |
| II             | 270 (52.5) | 244 (47.5) | 1.022 (0.736-1.418)    | 0.898              |
| III            | 130 (61.6) | 81 (38.4)  | 0.659 (0.430-1.010)    | 0.055              |
| IV             | 41 (64.1)  | 23 (35.9)  | 0.544 (0.271-1.091)    | 0.086              |
| Histology      |            |            |                        | 0.854 <sup>b</sup> |
| Clear cell     | 467 (55.4) | 376 (44.6) | 1.000 (reference)      |                    |
| Papillary      | 18 (50.0)  | 18 (50.0)  | 1.233 (0.627-2.424)    | 0.544              |
| Chromophobe    | 32 (58.2)  | 23 (41.8)  | 0.922 (0.523-1.624)    | 0.778              |
| Unclassified   | 44 (57.9)  | 32 (42.1)  | 1.059 (0.639-1.754)    | 0.825              |

<sup>a</sup> Adjusted for age, sex, BMI, smoking status, drinking status, hypertension, diabetes, family history of cancer, clinical stage, tumor grade and histology in logistic regression Dominant (TC/CC vs. TT) model;

<sup>b</sup> P for  $\chi^2$ -test of R-by-C table.

OR, odds ratio; CI, confidence interval.

Table S8. Univariate Cox regression analyses for survival by characteristics and clinical features of RCC patients.

| Variables                            | Patients/death | 5-year survival (%) <sup>a</sup> | Log-rank P   | HR (95% CI) <sup>b</sup>   | P <sup>b</sup> |
|--------------------------------------|----------------|----------------------------------|--------------|----------------------------|----------------|
| Total                                | 308/32         | 80                               |              |                            |                |
| Age (year) (mean ± SD)               | 57.55 ± 11.356 |                                  | <b>0.047</b> |                            |                |
| ≤57                                  | 158/12         | 85                               |              | 1.000 (reference)          |                |
| > 57                                 | 150/20         | 73                               |              | 2.042 (0.994-4.195)        | 0.052          |
| BMI (kg/m <sup>2</sup> ) (mean ± SD) | 24.22 ± 2.887  |                                  |              |                            |                |
| ≤24                                  | 140/20         | 76                               | 0.053        | 1.000 (reference)          |                |
| > 24                                 | 168/12         | 83                               |              | 0.498 (0.243-1.022)        | 0.057          |
| Gender                               |                |                                  | 0.401        |                            |                |
| Male                                 | 203/22         | 78                               |              | 1.000 (reference)          |                |
| Female                               | 105/10         | 83                               |              | 0.726 (0.343-1.537)        | 0.403          |
| Smoking status                       |                |                                  | <b>0.026</b> |                            |                |
| Never                                | 192/15         | 83                               |              | 1.000 (reference)          |                |
| Ever                                 | 116/17         | 74                               |              | <b>2.162 (1.078-4.337)</b> | <b>0.030</b>   |
| Drinking status                      |                |                                  | <b>0.013</b> |                            |                |
| Never                                | 219/18         | 86                               |              | 1.000 (reference)          |                |
| Ever                                 | 89/14          | 62                               |              | <b>2.395 (1.17-4.872)</b>  | <b>0.016</b>   |
| Hypertension                         |                |                                  | <b>0.013</b> |                            |                |
| No                                   | 187/14         | 85                               |              | 1.000 (reference)          |                |
| Yes                                  | 121/18         | 70                               |              | <b>2.382 (1.180-4.809)</b> | <b>0.015</b>   |
| Diabetes                             |                |                                  | 0.940        |                            |                |
| No                                   | 262/28         | 80                               |              | 1.000 (reference)          |                |
| Yes                                  | 46/4           | 75                               |              | 0.960 (0.336-2.748)        | 0.940          |
| Family history of cancer             |                |                                  | 0.443        |                            |                |
| No                                   | 283/29         | 80                               |              | 1.000 (reference)          |                |
| Yes                                  | 25/3           | —                                |              | 1.589 (0.482-5.224)        | 0.447          |
| Clinical stage                       |                |                                  | 0.863        |                            |                |
| Localized (I/II)                     | 251/25         | 80                               |              | 1.000 (reference)          |                |
| Advanced (III/IV)                    | 57/7           | 80                               |              | 1.077 (0.465-2.492)        | 0.863          |
| Tumor grade                          |                |                                  | 0.099        |                            |                |
| Well differentiated (I+II)           | 207/18         | 81                               |              | 1.000 (reference)          |                |



|                                 |        |    |                            |              |
|---------------------------------|--------|----|----------------------------|--------------|
| Moderately differentiated (III) | 72/7   | 82 | 0.985 (0.411-2.361)        | 0.973        |
| Poorly differentiated (IV)      | 29/7   | 68 | <b>2.439 (1.013-5.874)</b> | <b>0.047</b> |
| Histology                       |        |    | <b>0.001</b>               |              |
| Clear cell                      | 256/19 | 84 | 1.000 (reference)          |              |
| Others                          | 52/13  | 62 | <b>3.270 (1.612-6.634)</b> | <b>0.001</b> |

<sup>a</sup> Proportion of survival derived from Kaplan-Meier analysis.

<sup>b</sup> HR, hazard ratio, calculated by Cox Regression analysis.

Table S9. Stratification analyses of *MAGE-A11* rs6641352 genotypes associated with RCC patients' survival.

| Variables                | Patients/Death |      | Log-rank<br>P    | CC vs. TC/TT                    |                |
|--------------------------|----------------|------|------------------|---------------------------------|----------------|
|                          | TC/TT          | CC   |                  | HR(95%CI) <sup>a</sup>          | P <sup>a</sup> |
| Total                    | 295/26         | 13/6 | <b>&lt;0.001</b> | <b>3.526 (1.072-11.595)</b>     | <b>0.038</b>   |
| Age (years)              |                |      |                  |                                 |                |
| ≤57                      | 153/10         | 5/2  | <b>0.033</b>     | 7.600 (0.352-164.246)           | 0.196          |
| >57                      | 142/16         | 8/4  | <b>0.005</b>     | 3.532 (0.719-17.363)            | 0.120          |
| BMI (kg/m <sup>2</sup> ) |                |      |                  |                                 |                |
| ≤24                      | 132/17         | 8/3  | 0.079            | 4.838 (0.909-25.750)            | 0.065          |
| >24                      | 163/9          | 5/3  | <b>&lt;0.001</b> | 39.347 (0.114-13584.833)        | 0.218          |
| Gender                   |                |      |                  |                                 |                |
| Male                     | 192/16         | 11/6 | <b>&lt;0.001</b> | <b>11.565 (2.374-56.346)</b>    | <b>0.002</b>   |
| Female                   | 103/10         | 2/0  | 0.764            | —                               | 0.995          |
| Smoking status           |                |      |                  |                                 |                |
| Never                    | 187/14         | 5/1  | 0.278            | 1.838 (0.163-20.755)            | 0.623          |
| Ever                     | 108/12         | 8/5  | <b>0.002</b>     | <b>116.422 (7.487-1810.333)</b> | <b>0.001</b>   |
| Drinking status          |                |      |                  |                                 |                |
| Never                    | 210/16         | 9/2  | 0.189            | 1.808 (0.278-11.775)            | 0.536          |
| Ever                     | 85/10          | 4/4  | <b>&lt;0.001</b> | <b>14.442 (1.452-143.653)</b>   | <b>0.023</b>   |
| Hypertension             |                |      |                  |                                 |                |
| No                       | 180/11         | 7/3  | <b>0.002</b>     | <b>25.071 (2.548-246.701)</b>   | <b>0.006</b>   |
| Yes                      | 115/15         | 6/3  | <b>0.044</b>     | 1.980 (0.271-14.465)            | 0.501          |
| Diabetes                 |                |      |                  |                                 |                |
| No                       | 250/22         | 12/6 | <b>&lt;0.001</b> | <b>2.889 (0.849-9.829)</b>      | <b>0.090</b>   |
| Yes                      | 45/4           | 1/0  | 0.581            | 1.000 (0.001-666.841)           | 1.000          |
| Family history of cancer |                |      |                  |                                 |                |
| No                       | 273/24         | 10/5 | <b>&lt;0.001</b> | <b>6.077 (1.575-23.451)</b>     | <b>0.009</b>   |
| Yes                      | 22/2           | 3/1  | 0.567            | —                               | —              |
| Clinical stage           |                |      |                  |                                 |                |
| Localized (I/II)         | 241/20         | 10/5 | <b>&lt;0.001</b> | <b>3.339 (0.866-12.866)</b>     | <b>0.080</b>   |
| Advanced (III/IV)        | 54/6           | 3/1  | 0.458            | 0.057 (0.000-69.339)            | 0.429          |
| Tumor grade              |                |      |                  |                                 |                |

|                                              |        |      |                  |                            |       |
|----------------------------------------------|--------|------|------------------|----------------------------|-------|
| Well differentiated (I+II)                   | 198/14 | 9/4  | <b>0.001</b>     | 4.028 (0.764-21.244)       | 0.101 |
| Moderately differentiated (III) <sup>b</sup> | 71/6   | 1/1  | <b>&lt;0.001</b> | 21440.667(0.001-6.001E+11) | 0.254 |
| Poorly differentiated (IV) <sup>b</sup>      | 26/6   | 3/1  | 0.921            | 0.000(0.000-3.939E+54)     | 0.737 |
| Histology                                    |        |      |                  |                            |       |
| Clear cell                                   | 246/15 | 10/4 | <b>0.001</b>     | 5.403 (0.977-29.873)       | 0.053 |
| Others                                       | 49/11  | 3/2  | 0.101            | 5.632 (0.081-391.652)      | 0.425 |

<sup>a</sup> Adjusted for age, sex, BMI, smoking status, drinking, hypertension, diabetes, family history of cancer, clinical stage, grade and histology in Cox regression Recessive (CC vs. TC/TT) model.

Table S10. Stepwise Cox regression analysis on RCC-related survival.

| Final variables          | $\beta$ | SE    | HR    | 95% CI       | P      |
|--------------------------|---------|-------|-------|--------------|--------|
| BMI                      | -0.226  | 0.075 | 0.798 | 0.689-0.924  | 0.002  |
| Drinking status          | 0.482   | 0.186 | 1.620 | 1.125-2.333  | 0.010  |
| Hypertension             | 0.846   | 0.262 | 2.330 | 1.394-3.893  | 0.001  |
| Tumor grade              | 0.450   | 0.259 | 1.568 | 0.943-2.607  | 0.083  |
| Clinical stage           | -0.519  | 0.236 | 0.595 | 0.375-0.946  | 0.028  |
| Histology                | 0.624   | 0.143 | 1.866 | 1.411-2.467  | <0.001 |
| rs6641352 (CC vs. TC/TT) | 1.846   | 0.473 | 6.334 | 1.917-15.419 | <0.001 |

$\beta$ , regression coefficient; HR: hazard ratio; CI, confidence interval.

Table S11. Associations between the rs6540341 in MAGE-A11 gene and RCC patients' survival.

| rs6540341(C/T)           | Patients/deaths | 5-year survival (%) <sup>a</sup> | Log-rank P | HR (95% CI)         | HR (95% CI) <sup>b</sup> | P <sup>b</sup> |
|--------------------------|-----------------|----------------------------------|------------|---------------------|--------------------------|----------------|
| Total number of subjects | 308/32          | 80                               |            |                     |                          |                |
| Codominant model         |                 |                                  |            |                     |                          |                |
| CC                       | 198/19          | 76                               |            | 1.000 (reference)   | 1.000 (reference)        |                |
| TC                       | 93/10           | 83                               | 0.803      | 0.922 (0.425-2.002) | 0.914 (0.367-2.280)      | 0.848          |
| TT                       | 17/3            | —                                | 0.795      | 1.251 (0.365-4.293) | 0.904 (0.193-4.230)      | 0.898          |
| P trend                  |                 |                                  | 0.894      |                     |                          |                |
| Additive model           |                 |                                  | 0.898      | 1.038 (0.597-1.805) | 0.937 (0.475-1.848)      | 0.851          |
| Dominant model           |                 |                                  |            |                     |                          |                |
| CC                       | 198/19          | 76                               |            | 1.000 (reference)   | 1.000 (reference)        |                |
| TC/TT                    | 110/13          | 83                               | 0.957      | 0.980 (0.478-2.009) | 0.913 (0.379-2.201)      | 0.839          |
| Recessive model          |                 |                                  |            |                     |                          |                |
| CC/TC                    | 291/29          | 79                               |            | 1.000 (reference)   | 1.000 (reference)        |                |
| TT                       | 17/3            | —                                | 0.677      | 1.290 (0.389-4.279) | 0.951 (0.222-4.079)      | 0.946          |

BMI, body mass index; HR, hazard ratio.

Values in bold indicate statistically different.

<sup>a</sup> Proportion of survival derived from Kaplan-Meier analysis.

<sup>b</sup> Adjusted for age, sex, BMI, smoking status, drinking status, hypertension, diabetes and family history of cancer, clinical stage, tumor stage and histology in Cox regression model.
